# Supplementary material for: Trend of cerebral aneurysms over the past two centuries: need for early screening
Source: HighWire-hosted journal article supplement (doi:10.1136/bmjopen-2023-081290), 2024-02-01
Supplement: bmjopen-2023-081290supp004_data_supplement.pdf [file bmjopen-2023-081290supp004_data_supplement.pdf]

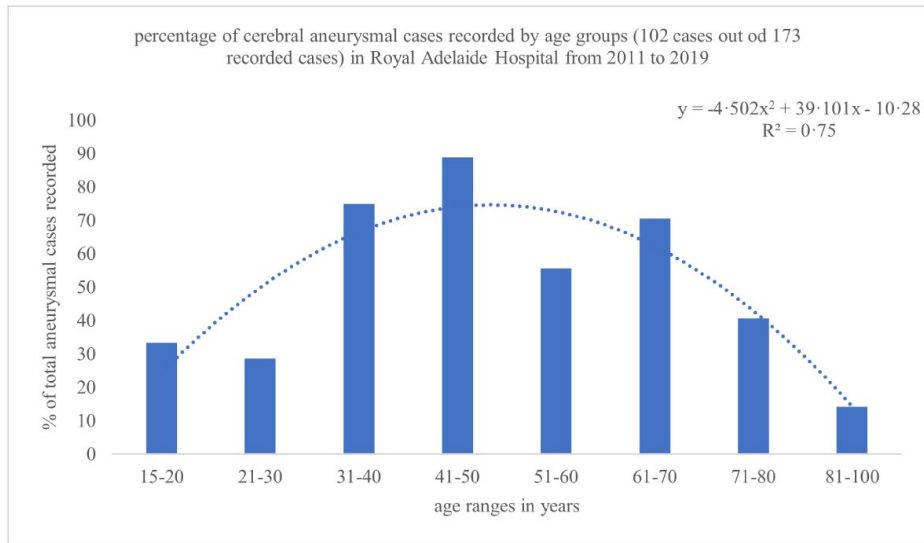

Supplementary File 4: The prevalence (%) of cerebral aneurysms observed over a broad age range (18-100 years,  $n=173$ , cases with aneurysms=102, cases without aneurysm=71), with a median of 62 years, a mean of 60 years, and a standard deviation of 15.75, is shown in the chart. The peak prevalence occurs between 31-60 years ( $p<0.001$ ).
